# Supplementary material for: Hedgehog Buckyball: A High-Symmetry Complete Polyhedral Oligomeric Silsesquioxane (POSS)
Source: MDPI journal article supplement (doi:10.3390/polym8080315), 2016-08-22

# Supplementary Materials: Hedgehog Buckyball: A High-Symmetry Complete Polyhedral Oligomeric Silsesquioxane (POSS)

Yu Hu, You Wang, Hong You and Di Wang

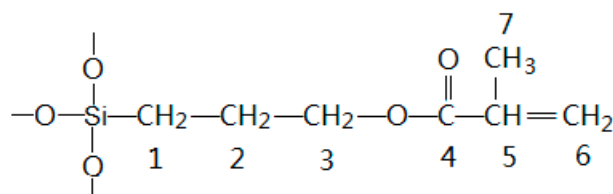

**Figure S1.** Structural formula of MSSO (numbers correspond to the assignment of <sup>1</sup>H- and <sup>13</sup>C-NMR peaks).

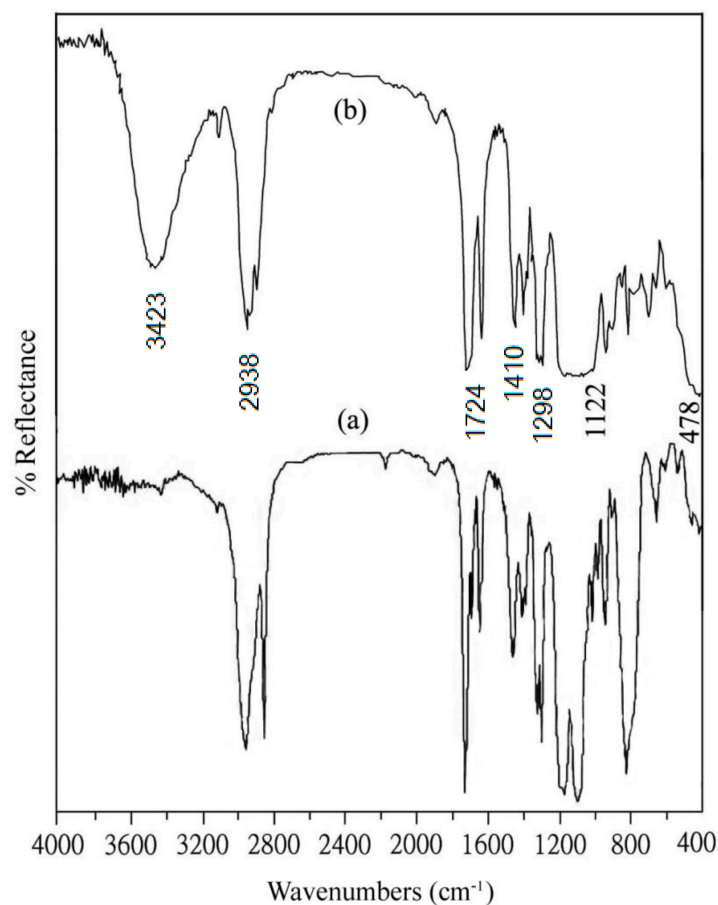

**Figure S2.** FTIR spectrum of MSSO: (a) Original material, MPMS; (b) The hydrolytic condensation of MPMS for 10 days (40 °C).

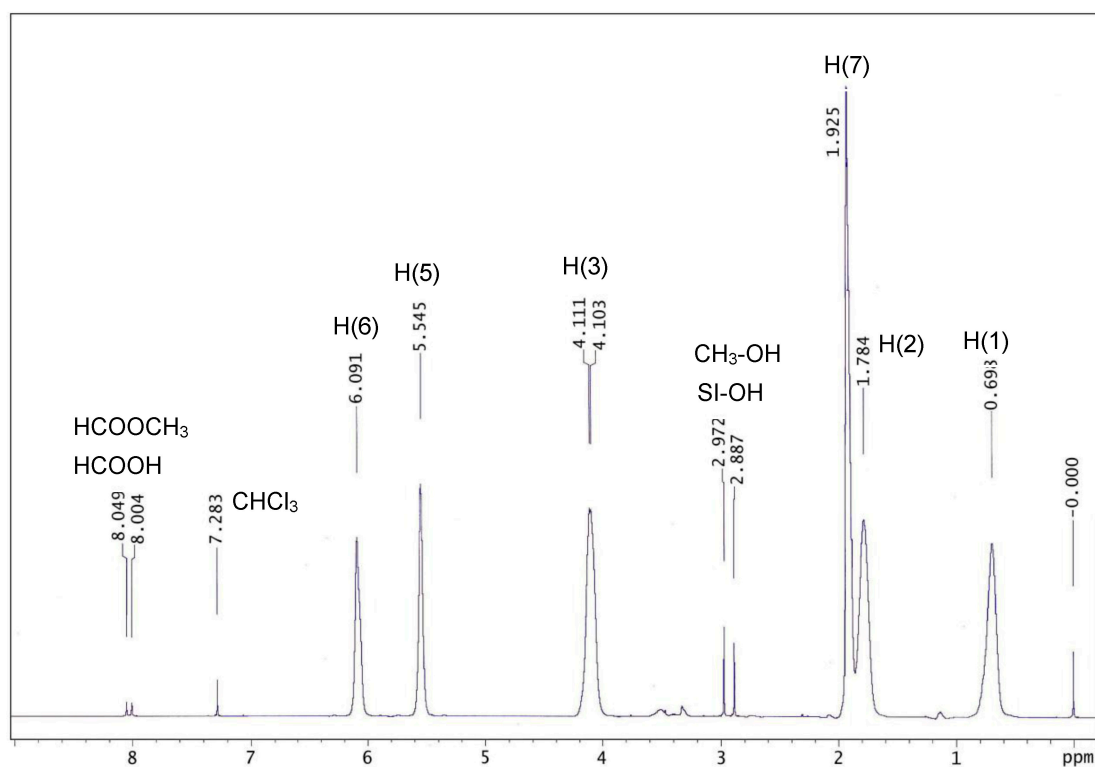

Figure S3.  $^1\text{H}$ -NMR spectrum (DMSO- $d_6$ , 25 °C) of MSSO.

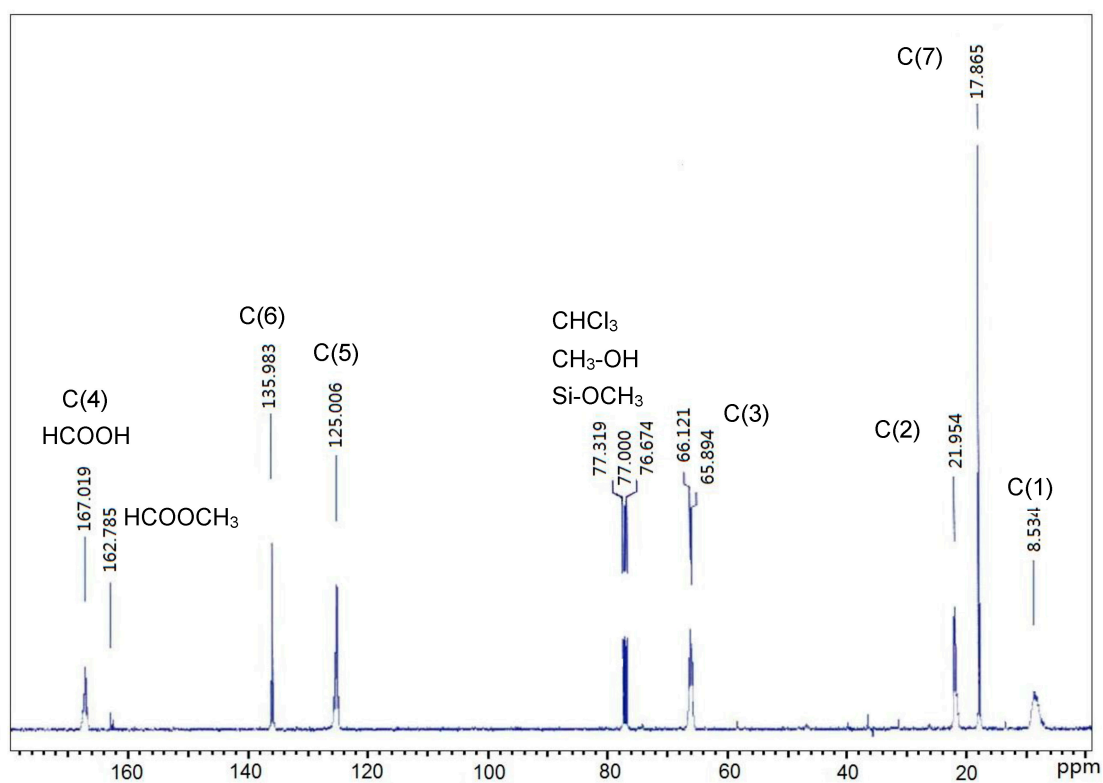

Figure S4.  $^{13}\text{C}$ -NMR spectrum (DMSO- $d_6$ , 25 °C) of MSSO.

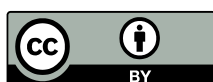

Supplement: s1 [file s1]
